# Supplementary material for: Seedless, copper-induced synthesis of stable Ag/Cu bimetallic nanoparticles and their optical properties
Source: Royal Society of Chemistry journal article supplement (doi:10.1039/c5ra26732c), 2016-01-01

### Supporting information

**Fig. S1.** Effect of  $[\text{Ag}^+]$  on the SRP absorbance of Ag@Cu bimetallic nanoparticles.

*Reaction conditions:*  $[\text{cysteine}] = 10.0 \times 10^{-4} \text{ mol dm}^{-3}$ ,  $[\text{CTAB}] = 10.0 \times 10^{-4} \text{ mol dm}^{-3}$ ,  $[\text{Cu}^{2+}] = 10.0 \times 10^{-4} \text{ mol dm}^{-3}$ .

**Fig. S2.** Time resolved UV-visible spectra of Ag/Cu nanocomposites. *Reaction*

*conditions:*  $[\text{cystine}] = 10.0 \times 10^{-4} \text{ mol dm}^{-3}$ ,  $[\text{Cu}^{2+}] = 10.0 \times 10^{-3} \text{ mol dm}^{-3}$ ,  $[\text{CTAB}] = 10.0 \times 10^{-4} \text{ mol dm}^{-3}$ ,  $[\text{Ag}^+] = 20.0 \times 10^{-4} \text{ mol dm}^{-3}$ .

**Fig. S3.** Effect of  $[\text{cysteine}]$  on the SRP absorbance of Ag@Cu (●) and CTAB-capped

Ag@Cu (○) bimetallic nanoparticles. *Reaction conditions:*  $[\text{Ag}^+] = 20.0 \times 10^{-4} \text{ mol dm}^{-3}$ ,  $[\text{CTAB}] = 10.0 \times 10^{-4} \text{ mol dm}^{-3}$ ,  $[\text{Cu}^{2+}] = 10.0 \times 10^{-4} \text{ mol dm}^{-3}$ .

Fig. S1.

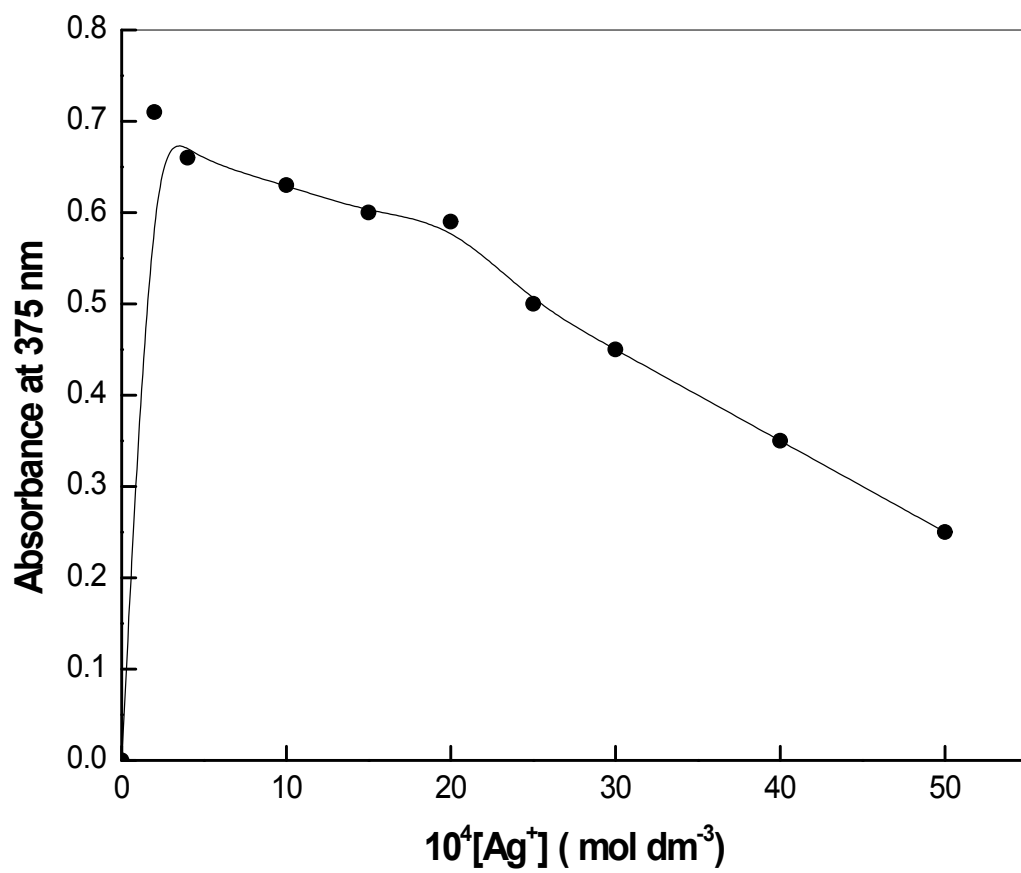

**Fig. S2.**

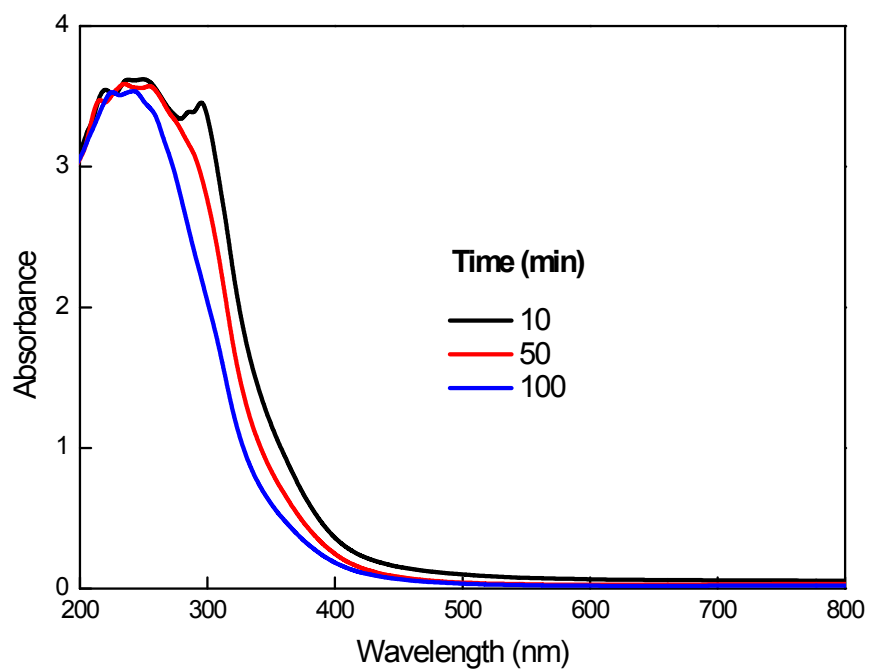

Fig. S3.

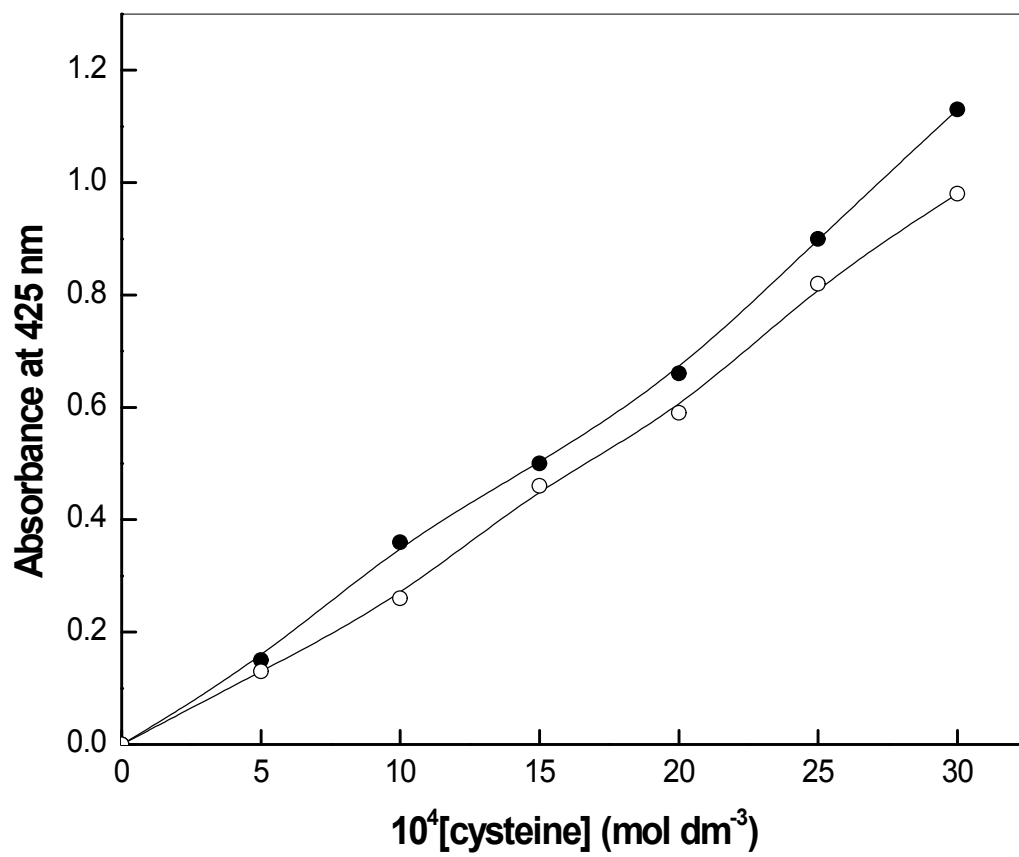

Supplement: c5ra26732c1.pdf [file c5ra26732c1.pdf]
